# Supplementary material for: Tacrolimus in the treatment of myasthenia gravis in patients with an inadequate response to glucocorticoid therapy: randomized, double-blind, placebo-controlled study conducted in China
Source: PubMed Central journal article supplement — Ther Adv Neurol Disord. 2017 Jul 26;10(9):315–25. doi: 10.1177/1756285617721092 (PMC5557184; doi:10.1177/1756285617721092), 2017-07-26
Supplement: Supplementary_Table_1.pdf [file Supplementary_Table_1.pdf]

Supplementary Table 1: (A) Definition of QMG score, (B) Osserman classification, (C) MG-ADL score and (D) MG-MMT scores.

| A) QMG score [Barohn Rj, 1998]              |                          |                                                     |                                                   |                      | Interpretation                                                                |
|---------------------------------------------|--------------------------|-----------------------------------------------------|---------------------------------------------------|----------------------|-------------------------------------------------------------------------------|
| Indicators tested                           | None                     | Mild                                                | Moderate                                          | Severe               |                                                                               |
| Level                                       | 0                        | 1                                                   | 2                                                 | 3                    | Maximum score: 39<br>Decrease in QMG score represents improvement in symptoms |
| Onset of diplopia gazing right or left (s)  | 61                       | 11–60                                               | 1–10                                              | Occurs spontaneously |                                                                               |
| Onset of ptosis gazing upwards (s)          | 61                       | 11–60                                               | 1–10                                              | Occurs spontaneously |                                                                               |
| Eyelids                                     | Normal closure           | Complete closure, some resistance to forced opening | Complete closure, no resistance to forced opening | Incomplete closure   |                                                                               |
| Swallowing 4 oz water                       | Normal                   | Slight cough or throat-clearing                     | Severe coughing/choking or nasal regurgitation    | Unable to swallow    |                                                                               |
| Onset of dysarthria counting from 1 to 50   | None when counting to 50 | Dysarthria at 30–49                                 | Dysarthria at 10–29                               | Dysarthria at 9      |                                                                               |
| Right arm outstretched (90 degrees sitting) | 240 s                    | 90–239 s                                            | 10–89 s                                           | 0–9 s                |                                                                               |
| Left arm outstretched (90 degrees sitting)  | 240 s                    | 90–239 s                                            | 10–89 s                                           | 0–9 s                |                                                                               |
| Lung capacity (% predicted)                 | ≥80                      | 65–79                                               | 50–64                                             | <50                  |                                                                               |
| Grip strength R (kg)<br>Male<br>Female      | ≥45<br>≥30               | 15–44<br>10–29                                      | 5–14<br>5–9                                       | 0–4<br>0–4           |                                                                               |
| Grip strength L (kg)<br>Male                | ≥35                      | 15–34                                               | 5–14                                              | 0–4                  |                                                                               |

|                                                   |                          |                                          |                                                   |                                              |                                            |                                                                                   |
|---------------------------------------------------|--------------------------|------------------------------------------|---------------------------------------------------|----------------------------------------------|--------------------------------------------|-----------------------------------------------------------------------------------|
| Female                                            | ≥25                      | 10–24                                    | 5–9                                               | 0–4                                          |                                            |                                                                                   |
| Head lifted (45 degrees supine)                   | 120 s                    | 30–119 s                                 | 1–29 s                                            | 0 s                                          |                                            |                                                                                   |
| Right leg outstretched (45 degrees supine)        | 100 s                    | 31–99 s                                  | 1–30 s                                            | 0 s                                          |                                            |                                                                                   |
| Left leg outstretched (45 degrees supine)         | 100 s                    | 31–99 s                                  | 1–30 s                                            | 0 s                                          |                                            |                                                                                   |
| B) Osserman classification [Osserman, 1958]       |                          |                                          |                                                   |                                              |                                            |                                                                                   |
| Classification                                    | 1                        | 2                                        | 3                                                 | 4                                            | 5                                          | A decrease in classification denotes improvement in disease                       |
| Description                                       | Ocular involvement alone | Mild muscular weakness                   | Moderate muscular disease                         | Incapacitating weakness of any muscle system | Life-threatening respiratory insufficiency |                                                                                   |
| C) MG-ADL profile [Muppidi <i>et al.</i> , 2011]  |                          |                                          |                                                   |                                              |                                            |                                                                                   |
| Grade                                             | 0                        | 1                                        | 2                                                 | 3                                            |                                            | Maximum score=24<br>A decrease in MG-ADL score denotes an improvement in symptoms |
| Talking                                           | Normal                   | Intermittent slurring or nasal speech    | Constant slurring or nasal, but can be understood | Difficult to understand speech               |                                            |                                                                                   |
| Chewing                                           | Normal                   | Fatigue with solid food                  | Fatigue with soft food                            | Gastric tube                                 |                                            |                                                                                   |
| Swallowing                                        | Normal                   | Rare episode of choking                  | Frequent choking necessitating changes in diet    | Gastric tube                                 |                                            |                                                                                   |
| Breathing                                         | Normal                   | Shortness of breath with exertion        | Shortness of breath at rest                       | Ventilator dependence                        |                                            |                                                                                   |
| Impairment of ability to brush teeth or comb hair | None                     | Extra effort, but no rest periods needed | Rest periods needed                               | Cannot perform one of these functions        |                                            |                                                                                   |

|                                                 |        |                           |                              |                             |                        |                                                                                              |
|-------------------------------------------------|--------|---------------------------|------------------------------|-----------------------------|------------------------|----------------------------------------------------------------------------------------------|
| Impairment of ability to arise from chair       | None   | Mild, sometimes uses arms | Moderate, always uses arms   | Severe, requires assistance |                        |                                                                                              |
| Double vision                                   | None   | Occurs, but not daily     | Daily, but not constant      | Constant                    |                        |                                                                                              |
| Eyelid drop                                     | None   | Occurs, but not daily     | Daily, but not constant      | Constant                    |                        |                                                                                              |
| D) MG-MMT scores [Sanders <i>et al.</i> , 2003] |        |                           |                              |                             |                        |                                                                                              |
| Score                                           | 0      | 1                         | 2                            | 3                           | 4                      | Sum scores for 30 muscle groups.<br>Decrease in MMT score represents improvement in symptoms |
| Description                                     | Normal | 25% weak/mild impairment  | 50% weak/moderate impairment | 75% weak/severe impairment  | Paralysed/unable to do |                                                                                              |

FAS, full analysis set; L, left; LOCF, last observation carried forward; MG-ADL, myasthenia gravis-related activities of daily living; MMT, manual muscle test; R, right; QMG, quantitative myasthenia gravis.
